# Supplementary material
Source: publisher site journal article supplement (https://www.dovepress.com/article/251070)
Supplement: Supplementary file 1 [file get_supplementary_file.php]

# Supplementary materials

**Supplementary Table 1:** Default inputs for TEAE of grade 3 or higher from selinexor occurring in at least 5% of patients1

| **TEAE** | **TEAE, n (%)**  **(N=123a)** | **Cost per TEAEb** |
| --- | --- | --- |
| **Blood and lymphatic system disorders** | | |
| Thrombocytopeniac | 72 (58.5) | $0.79 |
| Anemia | 52 (42.3) | $559.38 |
| Neutropenia | 27 (22.0) | $15.84 |
| Leukopenia | 15 (12.2) | $15.84 |
| Lymphopenia | 14 (11.4) | $23.76 |
| **Gastrointestinal disorders** | | |
| Nausea | 12 (9.8) | $611.82 |
| Diarrhea | 9 (7.3) | $823.56 |
| **General disorders and administration site conditions** | | |
| Fatigue | 24 (19.5) | $74.16 |
| Asthenia | 7 (5.7) | $74.16 |
| **Infection and infestation** | | |
| Pneumonia | 13 (10.6) | $9,077.30 |
| Sepsis | 12 (9.8) | $12,184.45 |
| **Metabolism and nutrition disorders** | | |
| Hyponatremia | 25 (20.3) | $833.15 |
| Hypokalemia | 7 (5.7) | $794.27 |

a TEAEs reported from the STORM clinical study report were limited to those occurring in at least 5% of patients at grade 3 or higher, among TEAEs occurring in at least 2% of patients.1

b See Supplementary Table 2 for calculations.

c The costs of romiplostim and eltrombopag were not included in the cost of treating thrombocytopenia at this time as these medications are not currently indicated for patients with myeloma with thrombocytopenia.

**Supplementary Table 2:** Estimation of cost per TEAE of grade 3 or higher from selinexoroccurring in at least 5% of patients2–4

| **TEAE** | **Resources used for treatment and follow-up** | **Unit cost (cost per resource)** |
| --- | --- | --- |
| **Blood and lymphatic system disorders** | | |
| Thrombocytopenia | 1 complete blood count (10% of patients) | $7.92a |
| Anemia | 2 blood transfusions  2 bags of packed RBCs (1 per transfusion)  1 complete blood count | $36.00a  $239.73b  $7.92a |
| Neutropenia | 2 complete blood counts | $7.92a |
| Leukopenia | 2 complete blood counts | $7.92a |
| Lymphopenia | 3 complete blood counts | $7.92a |
| **Gastrointestinal disorders** | | |
| Nausea | 1 physician visit  intravenous fluids at physician visit (90% of patients)  1 inpatient hospitalization for nausea (10% of patients) | $74.16a  $47.52a  $4,949c |
| Diarrhea | 1 physician visit  intravenous fluids at physician visit (90% of patients)  1 inpatient hospitalization for diarrhea (10% of patients) | $74.16a  $47.52a  $7,066c |
| **General disorders and administration site conditions** | | |
| Fatigue | 1 physician visit | $74.16a |
| Asthenia | 1 physician visit | $74.16a |
| **Infection and infestation** | | |
| Pneumonia | 1 inpatient hospitalization for pneumonia | $9,077c |
| Sepsis | 1 inpatient hospitalization for sepsis | $12,184c |
| **Metabolism and nutrition disorders** | | |
| Hyponatremia | 1 physician visit  1 additional physician visit (50% of patients)  1 electrolyte panel  intravenous fluids (sodium) (50% of patients)  1 inpatient hospitalization for hyponatremia | $74.16a  $8.64a  $47.52a  $6,895c |
| Hypokalemia | 1 physician visit  1 additional physician visit (50% of patients)  1 electrolyte panel  intravenous fluids (potassium) (50% of patients)  1 inpatient hospitalization for hypokalemia (10% of patients)  1 electrocardiogram (50% of patients) | $74.16a  $8.64a  $47.52a  $6,420c  $17.28a |

All costs inflated to 2018 values using PCE inflation index.3 Unless otherwise noted, 100% of patients with the TEAE used each resource.

CPT=current procedural terminology; ICD=International Statistical Classification of Diseases; PCE=personal consumption expenditure; RBC=red blood cells; TEAE=treatment-emergent adverse event.

a CPT codes: blood transfusion, 36430; electrolyte panel, 80051; complete blood count, 85027; electrocardiogram, 93000; intravenous infusion 31 minutes to 1 hour (hydration, sodium, or potassium), 96360; outpatient visit (15 minutes), 99213.5

b 2011 national blood collection and survey report by US Department of Health and Human Services.4

c ICD-9 codes: Nausea, 787.03; Diarrhea, 787.91; Pneumonia, 486; Sepsis, 995.91; Hyponatremia, 276.1; Hypokalemia, 276.8.2

**Supplementary Table 3:** One-way sensitivity analysis results for a private payer

| **Input parameter** | **Default estimate** | **Low value** | **High value** | **Budget impact in the first year** | | **Span** |
| --- | --- | --- | --- | --- | --- | --- |
| **Low** | **High** |
| Uptake of selinexor in year 1 after market entry | 28.0% | 25.2% | 30.8% | $48,876.82 | $59,738.33 | $10,861.51 |
| Time on treatment with selinexor, weeks | 8.0 | 7.2 | 8.8 | $49,195.33 | $59,419.81 | $10,224.48 |
| Cost of selinexor package | $22,000.00 | $19,800.00 | $24,200.00 | $49,204.53 | $59,410.62 | $10,206.09 |

**References**

1. Karyopharm Therapeutics, Inc. KCP-330-012 CSR. Data on file. 2018b.

2. HCUPnet, Healthcare Cost and Utilization Project. Agency for Healthcare Research and Quality, Rockville, MD. https://hcupnet.ahrq.gov/. Accessed December 18, 2018.

3. Bureau of Economic Analysis, 2018: Table 2.4.4U. Price Indexes for Personal Consumption Expenditures by Type of Product. December 2018.

4. The 2011 National Blood Collection and Utilization Survey Report. https://www.hhs.gov/sites/default/files/ash/bloodsafety/2011-nbcus.pdf. Accessed February 1, 2019.

5. Essential RBRVS 2018: A comprehensive listing of RBRVS values for CPT and HCPCS codes. 2018.
